# Supplementary material for: Zinc niobate materials: crystal structures, energy-storage capabilities and working mechanisms
Source: Royal Society of Chemistry journal article supplement (doi:10.1039/c9ta07818e), 2019-01-01
Supplement: c9ta07818e1.pdf [file c9ta07818e1.pdf]

## Supporting Information

### **Zinc niobate materials: crystal structures, energy-storage capabilities and working mechanisms**

*Xiangzhen Zhu<sup>a,b</sup>, Haijie Cao<sup>a,\*</sup>, Renjie Li<sup>b</sup>, Qingfeng Fu<sup>b</sup>, Guisheng Liang<sup>b</sup>, Yongjun  
Chen<sup>b</sup>, Lijie Luo<sup>b</sup>, Chunfu Lin<sup>a,b,\*</sup>, Xiu Song Zhao<sup>b,c</sup>*

*<sup>a</sup> Institute of Materials for Energy and Environment, School of Materials Science and  
Engineering, Qingdao University, Qingdao 266071, China*

*<sup>b</sup> State Key Laboratory of Marine Resource Utilization in South China Sea, School of  
Materials Science and Engineering, Hainan University, Haikou 570228, China*

*<sup>c</sup> School of Chemical Engineering, The University of Queensland, St Lucia, Brisbane,  
QLD 4072, Australia*

*\* Corresponding authors. E-mail addresses: caohj1582@hotmail.com (H. Cao),*

*linchunfu@qdu.edu.cn (C. Lin).*

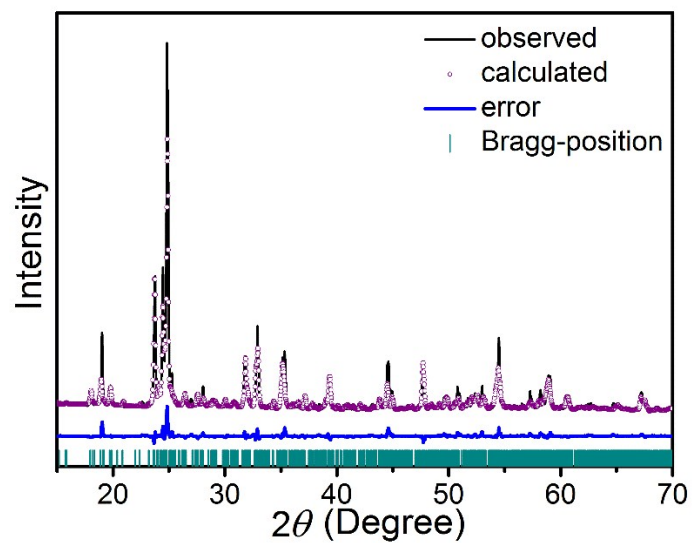

Fig. S1. XRD spectrum with Rietveld refinement of  $W_5Nb_{16}O_{55}$ .

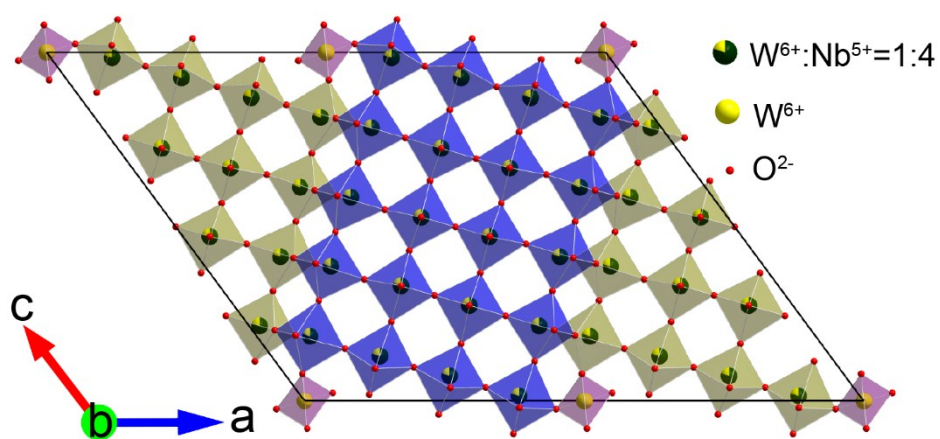

Fig. S2. Crystal structure of  $W_5Nb_{16}O_{55}$ .

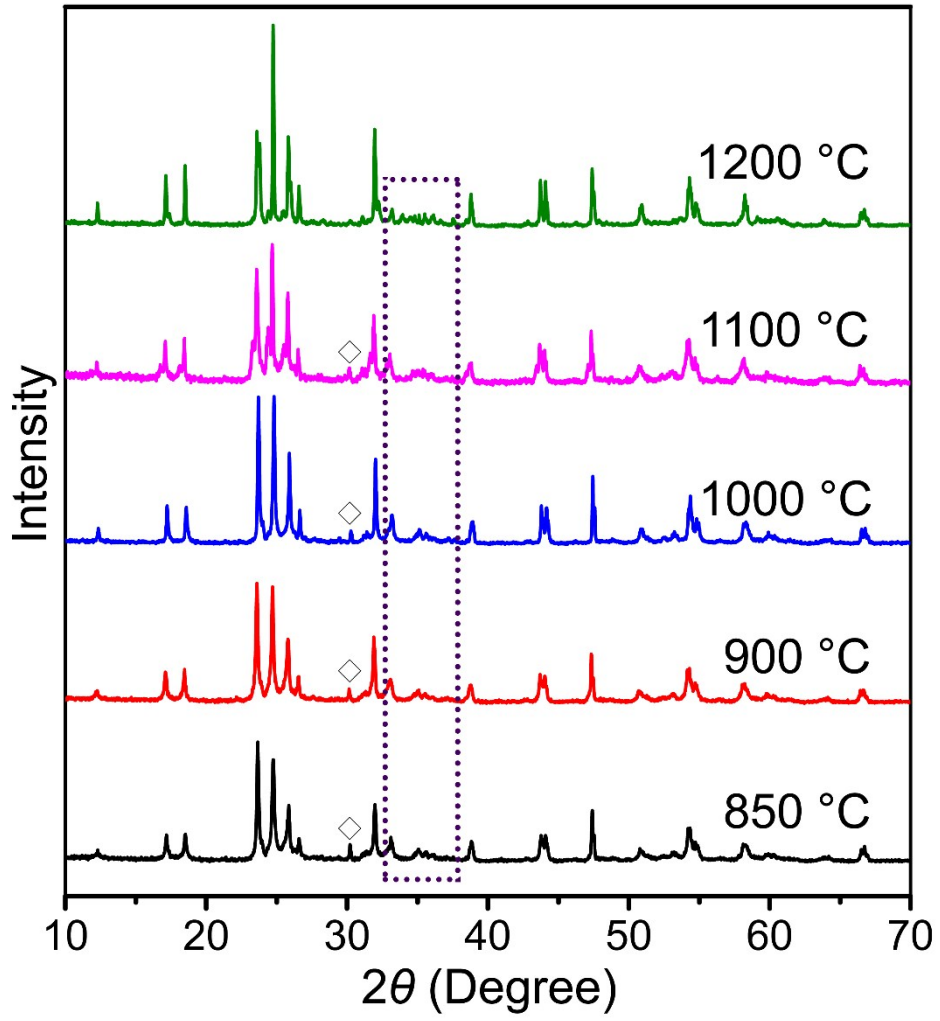

Fig. S3. XRD spectra of  $\text{Zn}_2\text{Nb}_{34}\text{O}_{87}\text{-N}$  sintered at 850, 900, 1000, 1100 and 1200 °C

(◇:  $\text{ZnNb}_2\text{O}_6$ ).

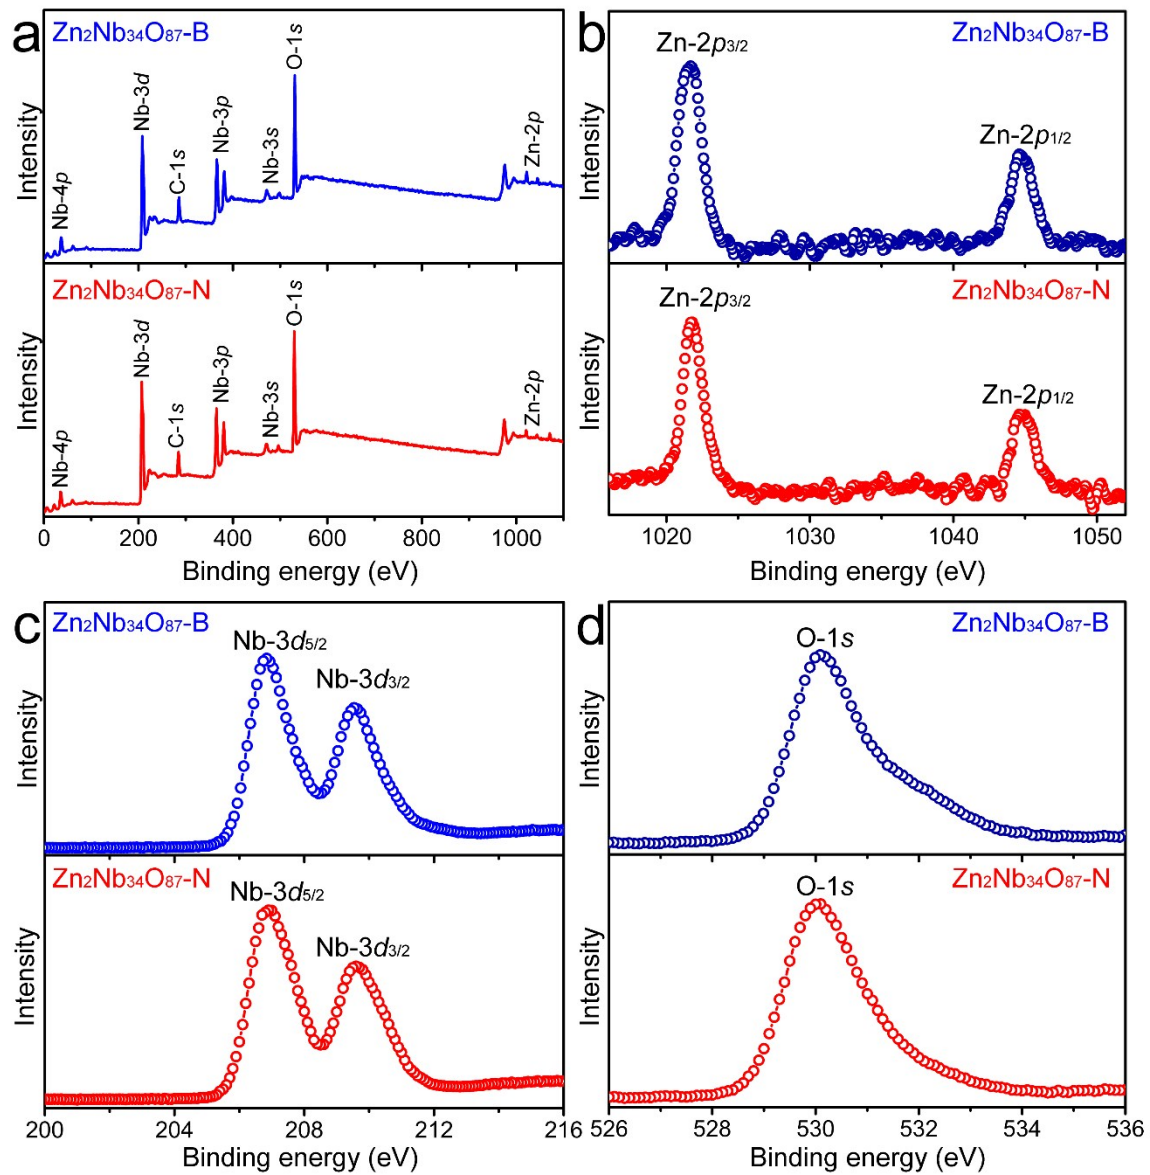

Fig. S4. (a) XPS survey spectra of  $\text{Zn}_2\text{Nb}_{34}\text{O}_{87}\text{-B}$  and  $\text{Zn}_2\text{Nb}_{34}\text{O}_{87}\text{-N}$ . XPS spectra of (b) Zn, (c) Nb and (d) O elements in  $\text{Zn}_2\text{Nb}_{34}\text{O}_{87}\text{-B}$  and  $\text{Zn}_2\text{Nb}_{34}\text{O}_{87}\text{-N}$ .

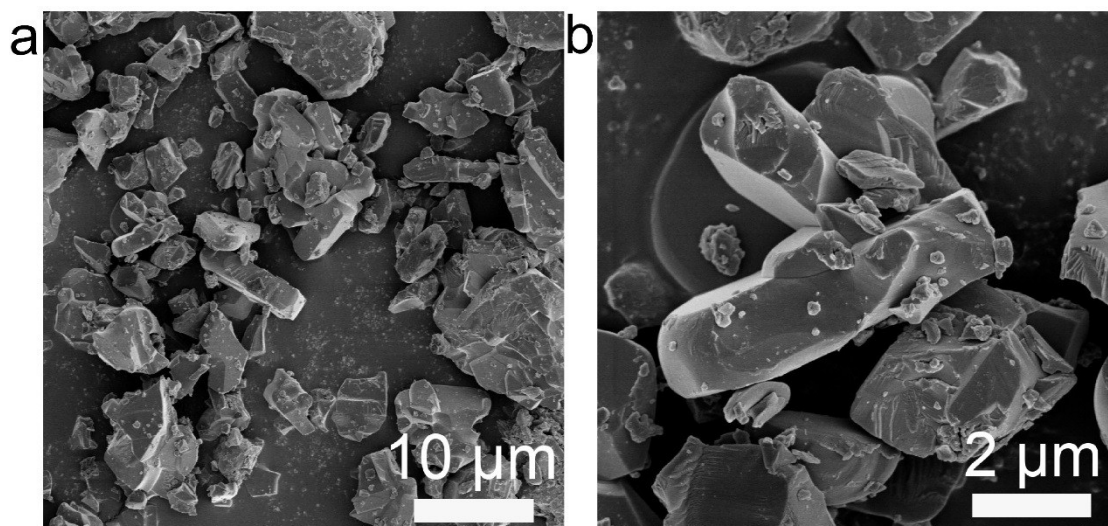

Fig. S5. (a, b) FESEM images of  $Zn_2Nb_{34}O_{87}$ -B.

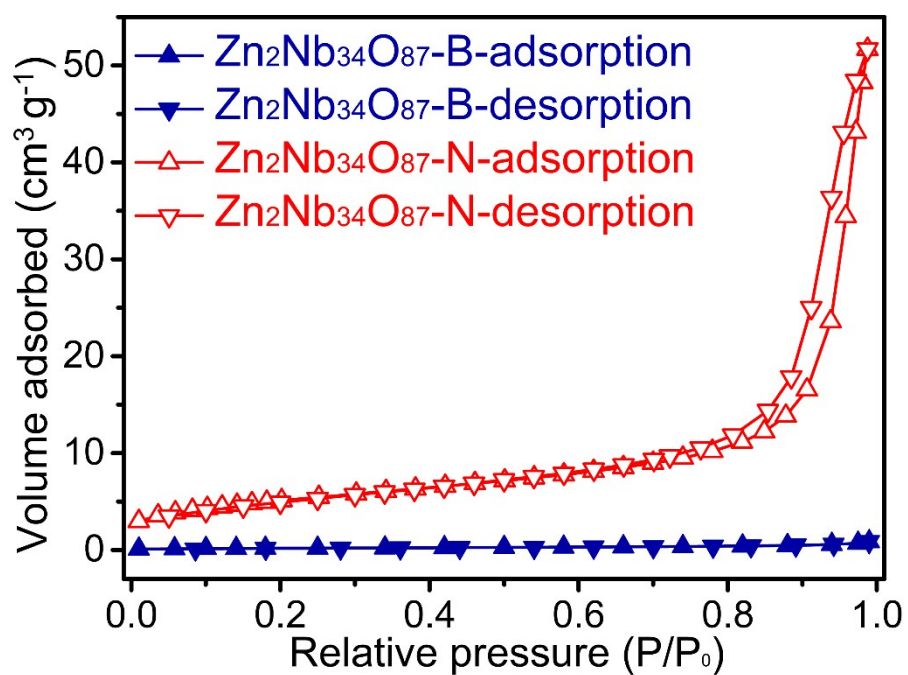

Fig. S6.  $N_2$  adsorption–desorption isotherms of  $Zn_2Nb_{34}O_{87}$ -B and  $Zn_2Nb_{34}O_{87}$ -N.



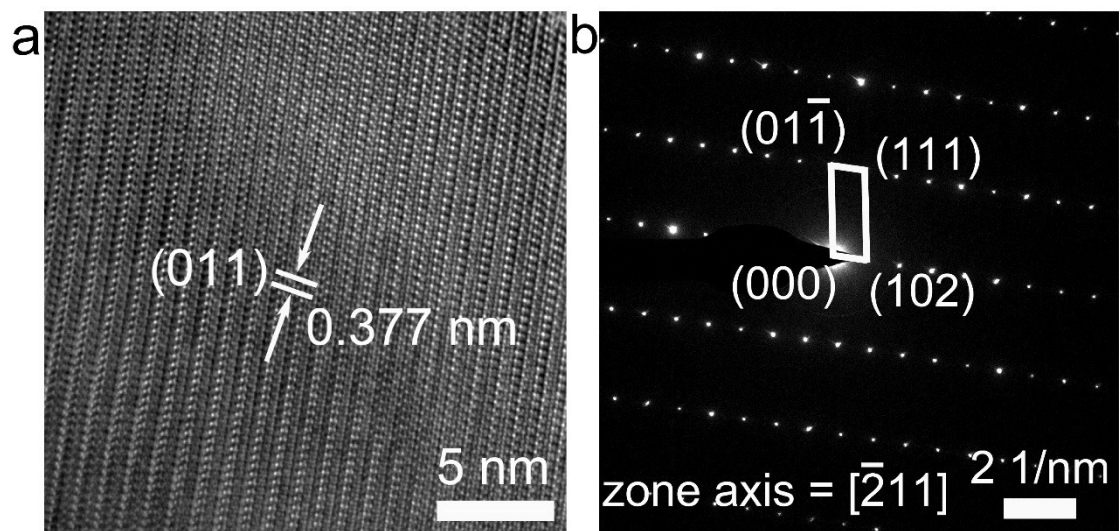

Fig. S7. (a) HRTEM image and (b) SAED pattern of  $\text{Zn}_2\text{Nb}_{34}\text{O}_{87}\text{-B}$ .

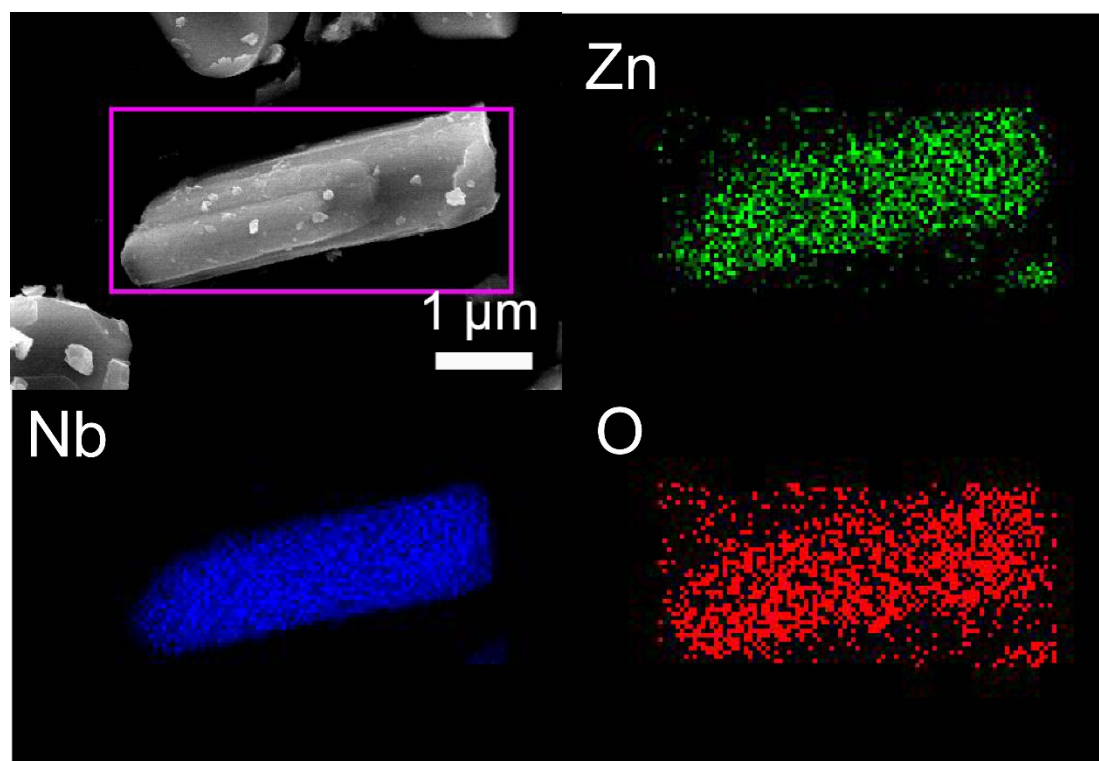

Fig. S8. EDX mapping images of  $\text{Zn}_2\text{Nb}_{34}\text{O}_{87}\text{-B}$ .

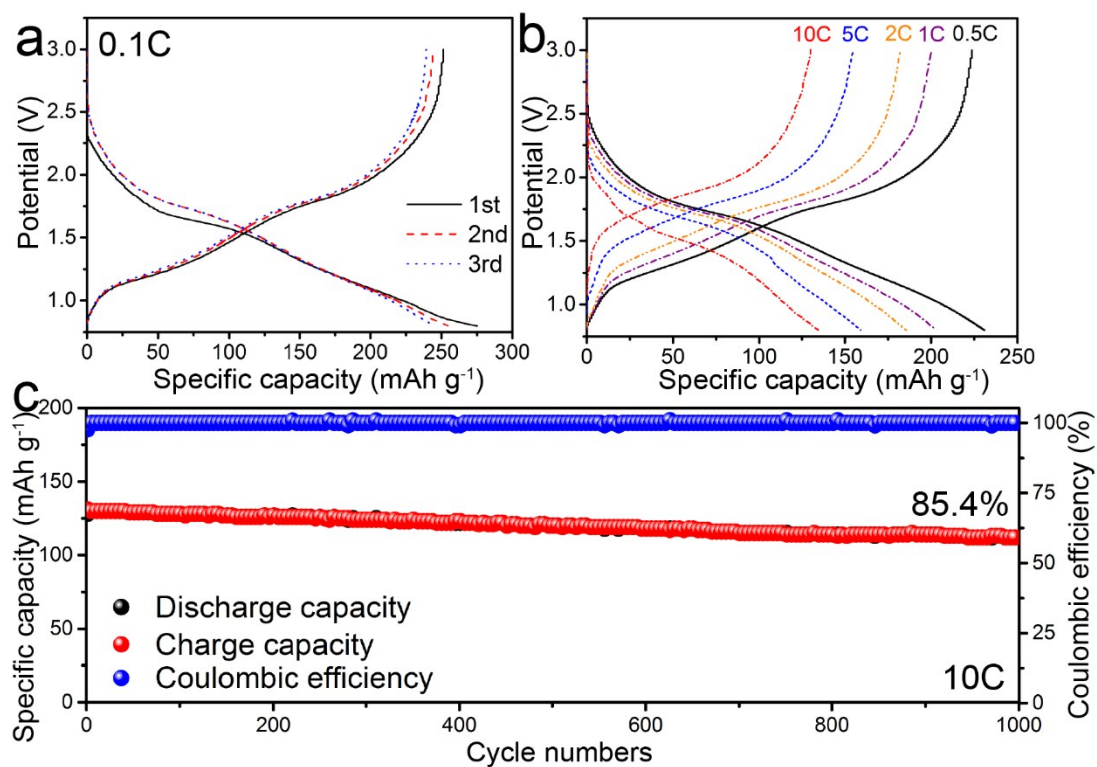

Fig. S9. Electrochemical performance of  $W_5Nb_{16}O_{55}/Li$  cell (the fabrication process of the  $W_5Nb_{16}O_{55}/Li$  cell is the same as that of the  $Zn_2Nb_{34}O_{87}/Li$  cell): discharge–charge curves at (a) 0.1C and (b) different current rates, and (c) cyclability at 10C over 1000 cycles.

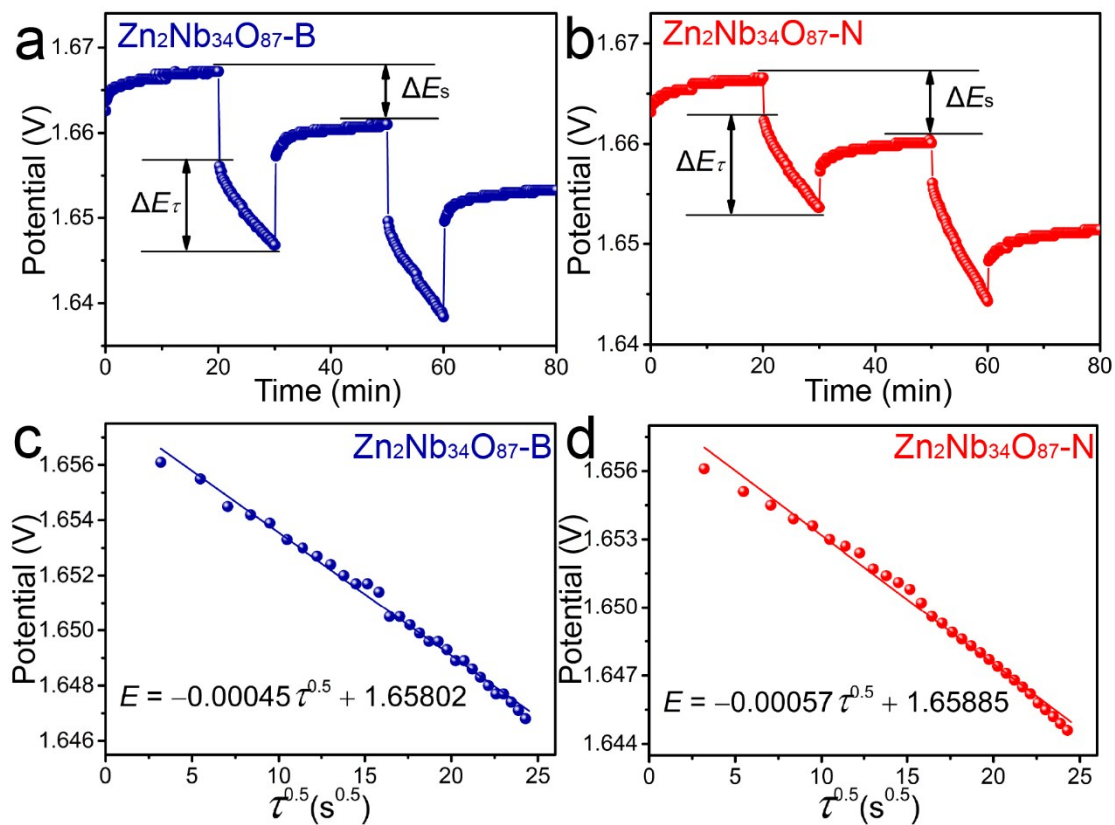

Fig. S10.  $E$  versus  $T$  curves for a single step in GITT experiment of (a)  $\text{Zn}_2\text{Nb}_{34}\text{O}_{87}\text{-B}$  and (b)  $\text{Zn}_2\text{Nb}_{34}\text{O}_{87}\text{-N}$ . Linear behavior of  $E$  versus  $\tau^{0.5}$  relationship during a typical titration in (c)  $\text{Zn}_2\text{Nb}_{34}\text{O}_{87}\text{-B}$  and (d)  $\text{Zn}_2\text{Nb}_{34}\text{O}_{87}\text{-N}$ .



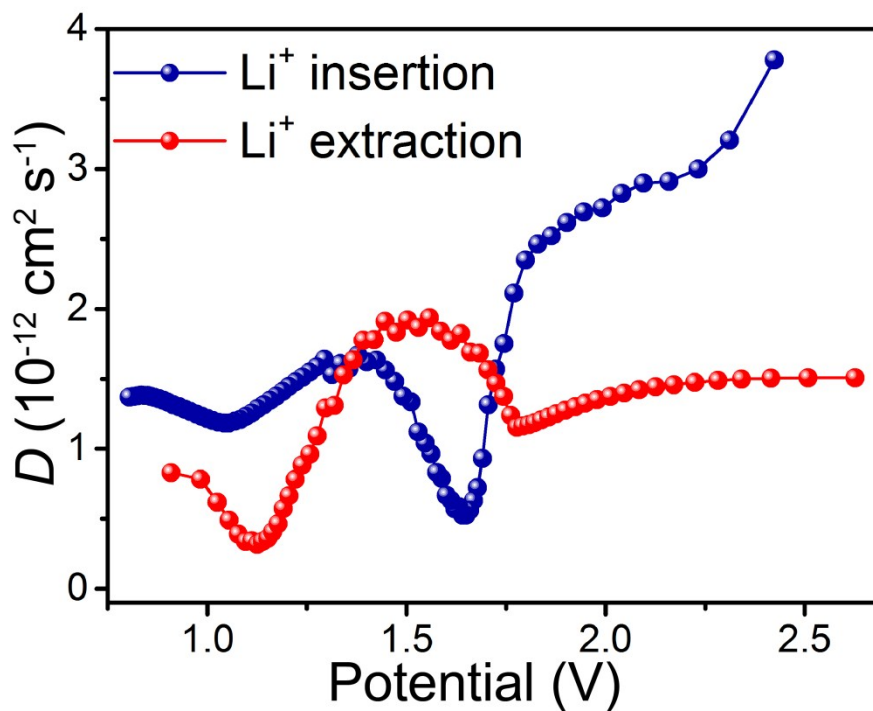

Fig. S11. Variation in  $\text{Li}^+$  diffusion coefficient of  $\text{W}_5\text{Nb}_{16}\text{O}_{55}$  calculated from GITT.

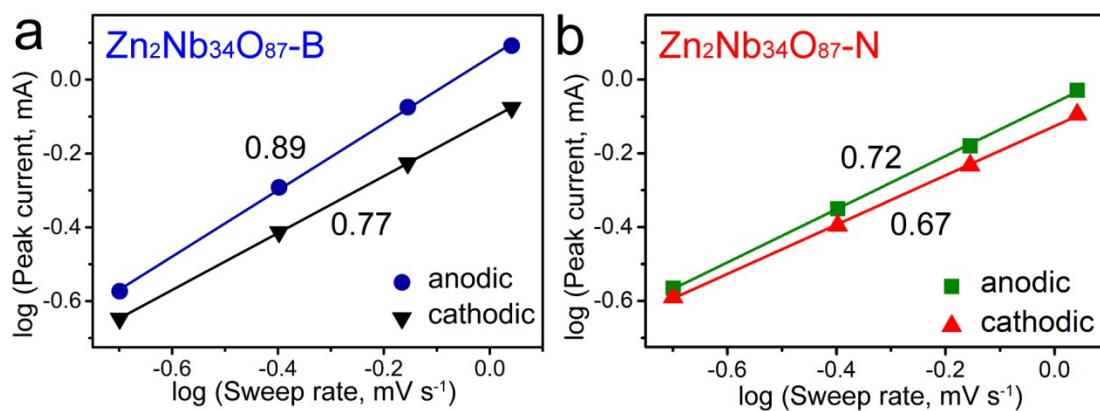

Fig. S12. Determination of  $b$ -values of (a)  $\text{Zn}_2\text{Nb}_{34}\text{O}_{87}\text{-B}$  and (b)  $\text{Zn}_2\text{Nb}_{34}\text{O}_{87}\text{-N}$  using relationship between logarithm of peak current and logarithm of sweep rate.

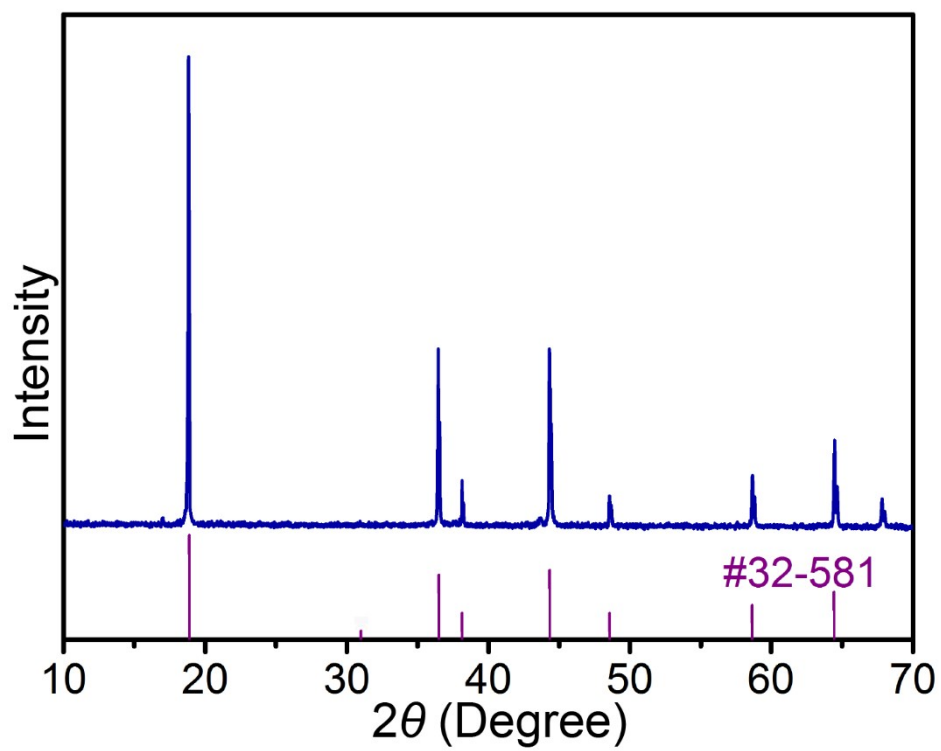

Fig. S13. XRD spectrum of  $\text{LiNi}_{0.5}\text{Mn}_{1.5}\text{O}_4$ .

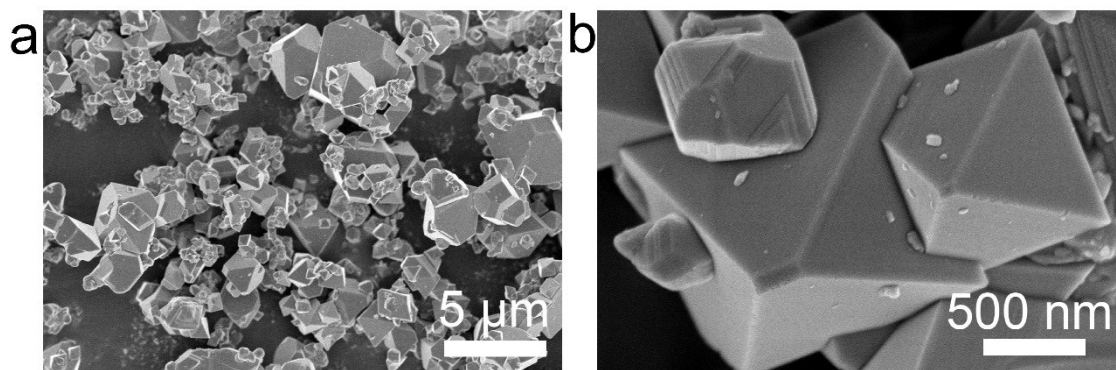

Fig. S14. (a) low-magnification and (b) high-magnification FESEM images of

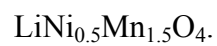

Table S1. Results of crystal analyses by Rietveld refinements in  $\text{Zn}_2\text{Nb}_{34}\text{O}_{87}\text{-B}$  (orthorhombic) with *Amma* space group,  $\text{Zn}_2\text{Nb}_{34}\text{O}_{87}\text{-N}$  (monoclinic) with *A2/m* space group, and  $\text{W}_5\text{Nb}_{16}\text{O}_{55}$  (monoclinic) with space group of *C2*.

| material                                          | <i>a</i> (nm)    | <b><i>b</i> (nm)</b>          | <i>c</i> (nm)    | $\alpha, \gamma$ (°) | $\beta$ (°)    | <i>V</i> (nm <sup>3</sup> ) |
|---------------------------------------------------|------------------|-------------------------------|------------------|----------------------|----------------|-----------------------------|
| $\text{Zn}_2\text{Nb}_{34}\text{O}_{87}\text{-B}$ | 2.871489<br>(11) | <b>0.382780</b><br><b>(2)</b> | 2.065497<br>(8)  | 90                   | 90             | 2.270295<br>(252)           |
| $\text{Zn}_2\text{Nb}_{34}\text{O}_{87}\text{-N}$ | 1.561179<br>(13) | <b>0.383217</b><br><b>(2)</b> | 2.066574<br>(14) | 90                   | 113.089<br>(6) | 1.137327<br>(177)           |
| $\text{W}_5\text{Nb}_{16}\text{O}_{55}$           | 2.970832<br>(41) | <b>0.381905</b><br><b>(4)</b> | 2.314088<br>(39) | 90                   | 126.546<br>(6) | 2.109270<br>(547)           |

Table S2. Fractional atomic parameters of  $\text{Zn}_2\text{Nb}_{34}\text{O}_{87}\text{-B}$  with space group of *Amma*.

| atom | site       | <i>x</i> | <i>y</i> | <i>z</i> |
|------|------------|----------|----------|----------|
| Zn1  | 8 <i>f</i> | 0.046206 | 0        | 0.040711 |
| Nb1  | 8 <i>f</i> | 0.046206 | 0        | 0.040711 |
| Nb2  | 8 <i>f</i> | 0.050236 | 0        | 0.666035 |
| Nb3  | 8 <i>f</i> | 0.046842 | 0        | 0.856061 |
| Nb4  | 8 <i>f</i> | 0.183754 | 0        | 0.037185 |
| Nb5  | 8 <i>f</i> | 0.183215 | 0        | 0.668334 |
| Nb6  | 8 <i>f</i> | 0.181841 | 0        | 0.854427 |
| O1   | 4 <i>c</i> | 0.250000 | 0        | 0.031265 |
| O2   | 4 <i>c</i> | 0.250000 | 0        | 0.679758 |
| O3   | 4 <i>c</i> | 0.250000 | 0        | 0.853859 |
| O4   | 8 <i>f</i> | 0.056530 | 0        | 0.541091 |
| O5   | 8 <i>f</i> | 0.035402 | 0        | 0.144409 |
| O6   | 8 <i>f</i> | 0.036660 | 0        | 0.753260 |
| O7   | 8 <i>f</i> | 0.039926 | 0        | 0.334375 |
| O8   | 8 <i>f</i> | 0.024082 | 0        | 0.957767 |
| O9   | 8 <i>f</i> | 0.114317 | 0        | 0.033460 |
| O10  | 8 <i>f</i> | 0.111637 | 0        | 0.663379 |
| O11  | 8 <i>f</i> | 0.109285 | 0        | 0.849359 |
| O12  | 8 <i>f</i> | 0.188744 | 0        | 0.573336 |
| O13  | 8 <i>f</i> | 0.180203 | 0        | 0.143517 |
| O14  | 8 <i>f</i> | 0.173937 | 0        | 0.759216 |
| O15  | 8 <i>f</i> | 0.183017 | 0        | 0.349929 |
| O16  | 8 <i>f</i> | 0.175322 | 0        | 0.953713 |

Table S3. Fractional atomic parameters of  $\text{Zn}_2\text{Nb}_{34}\text{O}_{87}\text{-N}$  with space group of  $A2/m$ .

| atom* | site | $x$      | $y$ | $z$      |
|-------|------|----------|-----|----------|
| M1    | $4i$ | 0.094900 | 0   | 0.068931 |
| M2    | $4i$ | 0.093568 | 0   | 0.688770 |
| M3    | $4i$ | 0.095237 | 0   | 0.887346 |
| M4    | $4i$ | 0.374830 | 0   | 0.148083 |
| M5    | $4i$ | 0.364012 | 0   | 0.778313 |
| M6    | $4i$ | 0.356387 | 0   | 0.955579 |
| O1    | $2d$ | 0.500000 | 0   | 0        |
| O2    | $4i$ | 0.070218 | 0   | 0.166963 |
| O3    | $4i$ | 0.072770 | 0   | 0.354527 |
| O4    | $4i$ | 0.084555 | 0   | 0.582856 |
| O5    | $4i$ | 0.082229 | 0   | 0.784255 |
| O6    | $4i$ | 0.131786 | 0   | 0.992904 |
| O7    | $4i$ | 0.214648 | 0   | 0.099463 |
| O8    | $4i$ | 0.221544 | 0   | 0.730309 |
| O9    | $4i$ | 0.209007 | 0   | 0.920269 |
| O10   | $4i$ | 0.343510 | 0   | 0.062637 |
| O11   | $4i$ | 0.350924 | 0   | 0.253865 |
| O12   | $4i$ | 0.368872 | 0   | 0.387533 |
| O13   | $4i$ | 0.370454 | 0   | 0.664701 |
| O14   | $4i$ | 0.359728 | 0   | 0.860083 |
| O15   | $4i$ | 0.495672 | 0   | 0.192593 |

\*M =  $1/18 \text{Zn}^{2+} + 17/18 \text{Nb}^{5+}$

Table S4. Comparisons of reversible/theoretical capacity of  $\text{Zn}_2\text{Nb}_{34}\text{O}_{87}\text{-B/}$   
 $\text{Zn}_2\text{Nb}_{34}\text{O}_{87}\text{-N}$  with previously reported insertion negative electrode materials.

| material                                          | theoretical capacity<br>(mAh g <sup>-1</sup> ) | capacity in reports<br>(mAh g <sup>-1</sup> ) | reference |
|---------------------------------------------------|------------------------------------------------|-----------------------------------------------|-----------|
| $\text{Zn}_2\text{Nb}_{34}\text{O}_{87}\text{-N}$ | 389                                            | 310                                           | this work |
| $\text{Zn}_2\text{Nb}_{34}\text{O}_{87}\text{-B}$ | 389                                            | 284                                           | this work |
| graphite                                          | 372                                            | 310                                           | [S1]      |
| $\text{Li}_4\text{Ti}_5\text{O}_{12}$             | 175                                            | 169                                           | [S2]      |
| $\text{TiNb}_2\text{O}_7$                         | 388                                            | 281                                           | [S3]      |
| $\text{Ti}_2\text{Nb}_{10}\text{O}_{29}$          | 396                                            | 247                                           | [S4]      |
| $\text{TiNb}_{24}\text{O}_{62}$                   | 402                                            | 296                                           | [S5]      |
| $\text{Nb}_2\text{O}_5$                           | 403                                            | 210                                           | [S6]      |
| $\text{FeNb}_{11}\text{O}_{29}$                   | 400                                            | 270                                           | [S7]      |
| $\text{GaNb}_{11}\text{O}_{29}$                   | 379                                            | 264                                           | [S8]      |
| $\text{GeNb}_{18}\text{O}_{47}$                   | 386                                            | 217                                           | [S9]      |
| $\text{PNb}_9\text{O}_{25}$                       | 381                                            | 200                                           | [S10]     |
| $\text{VNb}_9\text{O}_{25}$                       | 416                                            | 220                                           | [S11]     |
| $\text{WNb}_{12}\text{O}_{33}$                    | 302                                            | 228                                           | [S12]     |
| $\text{W}_5\text{Nb}_{16}\text{O}_{55}$           | 302                                            | 225                                           | [S13]     |
| $\text{BaNb}_{3.6}\text{O}_{10}$                  | 306                                            | 264                                           | [S14]     |
| $\text{K}_2\text{Nb}_8\text{O}_{21}$              | 371                                            | 281                                           | [S15]     |
| $\text{W}_9\text{Nb}_8\text{O}_{47}$              | 289                                            | 238                                           | [S16]     |
| $\text{W}_{16}\text{Nb}_{18}\text{O}_{93}$        | 228                                            | 195                                           | [S17]     |



Table S5. Comparisons of electrochemical performance of  $\text{Zn}_2\text{Nb}_{34}\text{O}_{87}\text{-B}$  and  $\text{Zn}_2\text{Nb}_{34}\text{O}_{87}\text{-N}$  with previously reported niobium-based oxide negative electrode materials.

| material                                                             | current rate | rate performance (mAh g <sup>-1</sup> ) | reference |
|----------------------------------------------------------------------|--------------|-----------------------------------------|-----------|
| $\text{Zn}_2\text{Nb}_{34}\text{O}_{87}\text{-N}$                    | 10C          | ~197 at 1000 <sup>th</sup> cycles       | this work |
| $\text{Zn}_2\text{Nb}_{34}\text{O}_{87}\text{-B}$                    | 10C          | ~140 at 1000 <sup>th</sup> cycles       | this work |
| $\text{W}_5\text{Nb}_{16}\text{O}_{55}$ micron-sized particles       | 10C          | ~111 at 1000 <sup>th</sup> cycles       | Fig. S9c  |
| $\text{TiNb}_2\text{O}_7$ nanoparticles                              | 10C          | ~123 at 500 <sup>th</sup> cycles        | [S18]     |
| $\text{TiNb}_2\text{O}_7$ nanofibers                                 | 5C           | ~170 at 500 <sup>th</sup> cycles        | [S19]     |
| $\text{TiNb}_2\text{O}_7$ nanorods                                   | 10C          | ~140 at 100 <sup>th</sup> cycles        | [S20]     |
| three-dimensional (3D) ordered macroporous $\text{TiNb}_2\text{O}_7$ | 10C          | ~87 at 100 <sup>th</sup> cycles         | [S21]     |
| $\text{Cu}_{0.02}\text{Ti}_{0.94}\text{Nb}_{2.04}\text{O}_7$         | 10C          | ~180 at 1000 <sup>th</sup> cycles       | [S22]     |
| $\text{Ti}_2\text{Nb}_{10}\text{O}_{29}$ hollow nanofibers           | 10C          | ~123 at 500 <sup>th</sup> cycles        | [S23]     |
| porous $\text{Ti}_2\text{Nb}_{10}\text{O}_{29}$ nanospheres          | 10C          | ~141 at 1000 <sup>th</sup> cycles       | [S24]     |
| porous $\text{TiNb}_{24}\text{O}_{62}$ microspheres                  | 10C          | ~183 at 500 <sup>th</sup> cycles        | [S5]      |
| $\text{WNb}_{12}\text{O}_{33}$ nanowires                             | 3C           | ~140 at 700 <sup>th</sup> cycles        | [S12]     |
| $\text{GeNb}_{18}\text{O}_{47}$ nanofibers                           | 2C           | ~162 at 200 <sup>th</sup> cycles        | [S9]      |
| $\text{VNb}_9\text{O}_{25}$ nanoribbons                              | 3C           | ~132 at 500 <sup>th</sup> cycles        | [S11]     |
| $\text{W}_9\text{Nb}_8\text{O}_{47}$ nanofibers                      | 5C           | ~113 at 1000 <sup>th</sup> cycles       | [S16]     |
| $\text{GaNb}_{11}\text{O}_{29}$ nanowebs                             | 10C          | ~153 at 1000 <sup>th</sup> cycles       | [S8]      |

## References

- [S1]Y.P. Wu, E. Rahm, R. Holze, Carbon anode materials for lithium ion batteries, *J. Power Sources* 114 (2003) 228–236.
- [S2]T.F. Yi, L.J. Jiang, J. Shu, C.B. Yue, R.S. Zhu, H.B. Qiao, Recent development and application of  $\text{Li}_4\text{Ti}_5\text{O}_{12}$  as anode material of lithium ion battery, *J. Phys. Chem. Solids* 71 (2010) 1236–1242.
- [S3]J.T. Han, Y.H. Huang, J.B. Goodenough, New anode framework for rechargeable lithium batteries, *Chem. Mater.* 23 (2011) 2027–2029.
- [S4]X.Y. Wu, J. Miao, W.Z. Han, Y.S. Hu, D.F. Chen, J.S. Lee, J. Kim, L.Q. Chen, Investigation on  $\text{Ti}_2\text{Nb}_{10}\text{O}_{29}$  anode material for lithium-ion batteries, *Electrochem. Commun.* 25 (2012) 39–42.
- [S5]C. Yang, S.J. Deng, C.F. Lin, S.W. Lin, Y.J. Chen, J.B. Li, H. Wu, Porous  $\text{TiNb}_{24}\text{O}_{62}$  microspheres as high-performance anode materials for lithium-ion batteries of electric vehicles, *Nanoscale* 8 (2016) 18792–18799.
- [S6]S.F. Lou, X.Q. Cheng, L. Wang, J.L. Gao, Q. Li, Y.L. Ma, Y.Z. Gao, P.J. Zuo, C.Y. Du, G.P. Yin, High-rate capability of three-dimensionally ordered macroporous  $\text{T-Nb}_2\text{O}_5$  through  $\text{Li}^+$  intercalation pseudocapacitance, *J. Power Sources* 361 (2017) 80–86.
- [S7]X.M. Lou, Z.H. Xu, Z.B. Luo, C.F. Lin, C. Yang, H. Zhao, P. Zheng, J.B. Li, N. Wang, Y.J. Chen, H. Wu, Exploration of  $\text{Cr}_{0.2}\text{Fe}_{0.8}\text{Nb}_{11}\text{O}_{29}$  as an advanced anode

material for lithium-ion batteries of electric vehicles, *Electrochim. Acta* 245 (2017) 482–488.

[S8]X.M. Lou, Q.F. Fu, J. Xu, X. Liu, C.F. Lin, J.X. Han, Y.P. Luo, Y.J. Chen, X.Y. Fan, J.B. Li, GaNb<sub>11</sub>O<sub>29</sub> nanoweb as high-performance anode materials for lithium-ion batteries, *ACS Appl. Nano Mater.* 1 (2018) 183–190.

[S9]F.M. Ran, X. Cheng, H.X. Yu, R.T. Zheng, T.T. Liu, X.F. Li, N. Ren, M. Shui, J. Shu, Nano-structured GeNb<sub>18</sub>O<sub>47</sub> as novel anode host with superior lithium storage performance, *Electrochim. Acta* 282 (2017) 634–641.

[S10]S. Patoux, M. Dolle, G. Rousse, C. Masquelier, A reversible lithium intercalation process in an ReO<sub>3</sub>-type structure PbNb<sub>9</sub>O<sub>25</sub>, *J. Electrochem. Soc.* 149 (2002) A391–A400.

[S11]S.S. Qian, H.X. Yu, L. Yan, H.J. Zhu, X. Cheng, Y. Xie, N.B. Long, M. Shui, J. Shu, High-rate long-life pored nanoribbon VNb<sub>9</sub>O<sub>25</sub> built by interconnected ultrafine nanoparticles as anode for lithium-ion batteries, *ACS Appl Mater. Interfaces* 9 (2017) 30608–30616.

[S12]L. Yan, H. Lan, H.X. Yu, S.S. Qian, X. Cheng, N.B. Long, R.F. Zhang, M. Shui, J. Shu, Electrospun WNb<sub>12</sub>O<sub>33</sub> nanowires: superior lithium storage capability and their working mechanism, *J. Mater. Chem. A* 5 (2017) 8972–8980.

[S13]K.J. Griffith, K.M. Wiaderek, G. Cibir, L.E. Marbella, C.P. Grey, Niobium tungsten oxides for high-rate lithium-ion energy storage, *Nature* 559 (2018) 556–563.

- [S14]X. Cheng, S.S. Qian, H.X. Yu, H.J. Zhu, Y. Xie, R.T. Zheng, T.T. Liu, M. Shui, J. Shu, BaNb<sub>3.6</sub>O<sub>10</sub> nanowires with superior electrochemical performance towards ultrafast and highly stable lithium storage, *Energy Storage Mater.* 16 (2019) 400–410.
- [S15]X. Cheng, H.J. Zhu, H.X. Yu, W.Q. Ye, R.T. Zheng, T.T. Liu, N. Peng, M. Shui, J. Shu, K<sub>2</sub>Nb<sub>8</sub>O<sub>21</sub> nanotubes with superior electrochemical performance for ultrastable lithium storage, *J. Mater. Chem. A* 6 (2018) 8620–8632.
- [S16]L. Yan, X. Cheng, H.X. Yu, H.J. Zhu, T.T. Liu, R.T. Zheng, R.F. Zhang, M. Shui, J. Shu, Ultrathin W<sub>9</sub>Nb<sub>8</sub>O<sub>47</sub> nanofibers modified with thermal NH<sub>3</sub> for superior electrochemical energy storage, *Energy Storage Mater.* 14 (2018) 159–168.
- [S17]W.Q. Ye, H.X. Yu, X. Cheng, H.J. Zhu, R.T. Zheng, T.T. Liu, N.B. Long, M. Shui, J. Shu, Highly efficient lithium container based on non-Wadsley-Roth structure Nb<sub>18</sub>W<sub>16</sub>O<sub>93</sub> nanowires for electrochemical energy storage, *Electrochim. Acta* 292 (2018) 331–338.
- [S18]S.F. Lou, Y.L. Ma, X.Q. Cheng, J.L. Gao, Y.Z. Gao, P.J. Zuo, C.Y. Du, G.P. Yin, Facile synthesis of nanostructured TiNb<sub>2</sub>O<sub>7</sub> anode materials with superior performance for high-rate lithium ion batteries, *Chem. Commun.* 51 (2015) 17293–17296.
- [S19]H. Park, T. Song, U. Paik, Porous TiNb<sub>2</sub>O<sub>7</sub> nanofibers decorated with conductive Ti<sub>1-x</sub>Nb<sub>x</sub>N bumps as a high power anode material for Li-ion batteries, *J. Mater. Chem. A* 3 (2015) 8590–8596.

- [S20]L. Hu, C.F. Lin, C.H. Wang, C. Yang, J.B. Li, Y.J. Chen, S.W. Lin,  $\text{TiNb}_2\text{O}_7$  nanorods as a novel anode materials for secondary lithium-ion batteries. *Funct. Mater. Lett.* 9 (2016) 1642004.
- [S21]S.F. Lou, X.Q. Cheng, Y. Zhao, A. Lushington, J.L. Gao, Q. Li, P.J. Zuo, B.Q. Wang, Y.Z. Gao, Y.L. Ma, C.Y. Du, G.P. Yin, X.L. Sun, Superior performance of ordered macroporous  $\text{TiNb}_2\text{O}_7$  anodes for lithium ion batteries: understanding from the structural and pseudocapacitive insights on achieving high rate capability, *Nano Energy* 34 (2017) 15–25.
- [S22]C. Yang, C.F. Lin, S.W. Lin, Y.J. Chen, J.B. Li,  $\text{Cu}_{0.02}\text{Ti}_{0.94}\text{Nb}_{2.04}\text{O}_7$ : an advanced anode material for lithium-ion batteries of electric vehicles, *J. Power Sources* 328 (2016) 336–344.
- [S23]Q.F. Fu, J.R. Hou, R.H. Lu, C.F. Lin, Y. Ma, J.B. Li, Y.J. Chen, Electrospun  $\text{Ti}_2\text{Nb}_{10}\text{O}_{29}$  hollow nanofibers as high-performance anode materials for lithium-ion batteries, *Mater. Lett.* 214 (2018) 60–63.
- [S24]S.F. Lou, X.Q. Cheng, J.L. Gao, Q. Li, L. Wang, Y. Cao, Y.L. Ma, P.J. Zuo, Y.Z. Gao, C.Y. Du, H. Huo, G.P. Yin, Pseudocapacitive  $\text{Li}^+$  intercalation in porous  $\text{Ti}_2\text{Nb}_{10}\text{O}_{29}$  nanospheres enables ultra-fast lithium storage, *Energy Storage Mater.* 11 (2018) 57–66.
